# Supplementary material for: Exploring the Severity Strata of Disease Activity and Repigmentation in Vitiligo Based on Validated Physician Global Assessment (PGA) Scores
Source: MDPI journal article supplement (doi:10.3390/jcm13092680), 2024-05-02
Supplement: s1 [file s1]

## SUPPLEMENTARY MATERIAL

**Table S1: Hypotheses PGA activity (worsening) and PGA repigmentation (improvement)**

| Hypothesis PGA activity (worsening)                                                                                                                                                                                                                                                     | Results PGA activity (worsening)                                                                                                      | Confirmed (C) or failed (F) |
|-----------------------------------------------------------------------------------------------------------------------------------------------------------------------------------------------------------------------------------------------------------------------------------------|---------------------------------------------------------------------------------------------------------------------------------------|-----------------------------|
| 1. We expect a rank correlation coefficient of at least 0.5 between the overall median VDAS <sub>15</sub> and the overall median PGA score.                                                                                                                                             | Rho= 0.956 (95%CI: 0.928-0.973)                                                                                                       | C                           |
| 2. We expect a rank correlation coefficient of at least 0.4 between the overall median PGA and the relative percentage worsening (in %) between 2 time points of the VESplus score (baseline VESplus versus time point 1 VESplus).                                                      | Rho= 0.832 (95%CI: 0.736-0.896)                                                                                                       | C                           |
| 3. Patients with an interval of 12 (+/-2) months will have more often (majority of cases >50% of all cases) a higher PGA disease activity (worsening) score (median of all raters) than patients with an interval of 6 (+/- 2) months.                                                  | FU 6 (+/- 2) months: median PGA= 0<br>FU 12(+/-2) months PGA = median PGA= 2<br>=> more cases higher PGA in 12 months versus 6 months | C                           |
| 4. We expect that patients with more than 5 involved body locations* will have an at least 10% higher mean PGA* compared to patients with less than 6 involved body locations                                                                                                           | N ≤ 5: PGA= 1.4063<br>N > 5: PGA= 2.00<br>42.2% higher                                                                                | C                           |
| Hypothesis PGA repigmentation (improvement)                                                                                                                                                                                                                                             | Results PGA repigmentation (improvement)                                                                                              | Confirmed (C) or failed (F) |
| 1. We expect a rank correlation coefficient of at least 0.5 between the PGA (median of all raters) disease improvement score and the VDIS <sub>15</sub> (number of locations with repigmentation, scale 0-15; median of all raters).                                                    | Rho= 0.839 (95% CI: 0.746-0.900)                                                                                                      | C                           |
| 2. We expect a rank correlation coefficient of at least 0.4 between the PGA (median of all raters) disease improvement score and the relative percentage improvement (repigmentation) (in %) between 2 time points of the VESplus score (baseline VESplus versus time point 1 VESplus). | Rho= 0.554 (95% CI: 0.353-0.705)                                                                                                      | C                           |
| 3. In patients with an overall (median of all raters) VDIS <sub>15</sub> (number of locations with repigmentation, scale 0-15) of ≥5/15, the answer of the median PGA disease repigmentation score will be at least “slightly improved (or more)” in at least 60%% of cases.            | 100%                                                                                                                                  | C                           |
| 4. We expect an inverse rank correlation coefficient of at least 0.4 between the PGA disease improvement score and the                                                                                                                                                                  | Rho= -0.253 (95% CI: -0.466- -0.012)                                                                                                  | F                           |

|                                                                                                                     |  |  |
|---------------------------------------------------------------------------------------------------------------------|--|--|
| (median of all raters) VDAS <sub>15</sub> (number of locations with progression, scale 0-15; median of all raters). |  |  |
|---------------------------------------------------------------------------------------------------------------------|--|--|
